# Prevalence of hepatitis A virus among migrant workers in Qatar: A national study

Nadin Younes<sup>1,2</sup>, Hiam Chemaitelly<sup>3,4,5</sup>, Parveen Banu Nizamuddin<sup>1</sup>, Tasneem Al-Hamad<sup>1,6</sup>, Marah Abdallah<sup>1,7</sup>, Hadi M Yassine<sup>1,2</sup>, Laith J Abu-Raddad<sup>3,4,5,8,9</sup>, Gheyath K. Nasrallah<sup>1,2,\*</sup>

<sup>1</sup>Department of Biomedical Science, College of Health Sciences, QU Health, Qatar University, Doha, Qatar

<sup>2</sup>Biomedical Research Center, Qatar University, Doha, Qatar

<sup>3</sup>Infectious Disease Epidemiology Group, Weill Cornell Medicine-Qatar, Cornell University, Doha, Qatar

<sup>4</sup>World Health Organization Collaborating Centre for Disease Epidemiology Analytics on HIV/AIDS, Sexually Transmitted Infections, and Viral Hepatitis, Weill Cornell Medicine-Qatar, Cornell University, Qatar Foundation – Education City, Doha, Qatar

<sup>5</sup>Department of Population Health Sciences, Weill Cornell Medicine, Cornell University, New York, New York, USA

<sup>6</sup>Qatar Biobank, Doha, Qatar

<sup>7</sup>Clinical Microbiology & Virology division, Hamad General Hospital, Doha, Qatar

<sup>8</sup>Department of Public Health, College of Health Sciences, QU Health, Qatar University, Doha, Qatar

<sup>9</sup>College of Health and Life Sciences, Hamad bin Khalifa University, Doha, Qatar

**Word count:** Abstract: 276 words, Main Text: 2,274 words.

**Number of figures:** 2.

**Number of tables:** 2.

**Running head:** HAV prevalence among workers in Qatar.

**Disclose funding received for this work:** Other

## Correspondence

Dr. Gheyath K. Nasrallah, Department of Biomedical Science, College of Health Sciences, Qatar University, Doha 2713, Qatar. Tel: +(974) 4403-4817, Email: [gheyath.nasrallah@qu.edu.qa](mailto:gheyath.nasrallah@qu.edu.qa)

33 **ABSTRACT**

34 **Background:** Hepatitis A virus (HAV) is the predominant cause of acute viral hepatitis  
35 worldwide; however, data on HAV antibody prevalence (seroprevalence) among migrant  
36 populations are limited. This study aimed to investigate HAV seroprevalence among Qatar's  
37 migrant craft and manual workers (CMWs), constituting approximately 60% of the country's  
38 population.

39 **Methods:** HAV antibody testing was conducted on stored serum specimens obtained from CMWs  
40 during a nationwide severe acute respiratory syndrome coronavirus 2 (SARS-CoV-2) population-  
41 based cross-sectional survey between July 26 and September 9, 2020. Associations with HAV  
42 infection were investigated through regression analyses.

43 **Results:** Of the 2,607 specimens with HAV antibody test results, 2,393 were positive, and 214  
44 were negative. The estimated HAV seroprevalence among CMWs was 92.0% (95% CI: 90.9-  
45 93.1%). HAV seroprevalence was generally high but exhibited some variation, ranging from  
46 70.9% (95% CI: 62.4-78.2%) among Sri Lankans to 99.8% (95% CI: 98.2-99.9%) among  
47 Pakistanis. The multivariable regression analysis identified age, nationality, and educational  
48 attainment as statistically significant factors associated with HAV infection. Relative to CMWs  
49 aged  $\leq 29$  years, the adjusted relative risk (ARR) was 1.06 (95% CI: 1.03-1.10) in CMWs aged 30-  
50 39 years and reached 1.15 (95% CI: 1.10-1.19) in those aged  $\geq 50$  years. In comparison to Indians,  
51 the ARR was lower among Sri Lankans, assessed at 0.81 (95% CI: 0.72-0.91), but higher among  
52 Nepalese at 1.07 (95% CI: 1.04-1.11), Bangladeshis at 1.10 (95% CI: 1.07-1.13), Pakistanis at 1.12  
53 (95% CI: 1.09-1.15), and Egyptians at 1.15 (95% CI: 1.08-1.23). No evidence for differences was  
54 found by geographic location or occupation.

55 **Conclusions:** HAV seroprevalence among Qatar's CMW population is very high, with over nine  
56 out of every ten individuals having been exposed to this infection, likely during childhood.

57 **Keywords:** Hepatitis; HAV; prevalence; infection; workers; cross-sectional; Qatar

58

## 59 INTRODUCTION

60 Hepatitis A virus (HAV) stands as the predominant cause of acute viral hepatitis globally (1).  
61 While HAV often results in mild illness, there are rare instances where the infection progresses to  
62 acute liver failure and, ultimately, death (2). Although vaccine preventable (3), the estimated  
63 annual incidence of HAV infections exceeds 150 million, with an associated death toll surpassing  
64 39,000 in 2019 (4).

65 HAV is mainly transmitted via the fecal-oral route through the ingestion of contaminated food and  
66 water (5). Other modes of transmission include exposure to infected body fluids or close physical  
67 contact such as oral or anal intercourse with an infectious person (6). The largest burden of  
68 infection is concentrated in low- and middle-income countries where inadequate sanitary  
69 conditions prevail, with most infections occurring asymptotically during childhood (4). The  
70 endemic nature of HAV in these countries leads to frequent exposures in early life and a large  
71 proportion of immune adults (7). In higher income countries, susceptible adults face the risk of  
72 symptomatic infection, with outbreaks documented among international travelers and specific  
73 populations at risk such as men who have sex with men, people who inject drugs, and homeless  
74 populations (3, 6). Recent trends also indicate a rise in foodborne outbreaks due to the globalization  
75 of trade (7, 8).

76 The World Health Organization (WHO) formulated the Global Health Sector Strategy 2022-2030,  
77 envisioning the elimination of viral hepatitis as a public health concern by 2030 (9). Currently, the  
78 WHO recommends universal vaccination against HAV but only in countries where individuals  
79 face an intermediate risk of infection, defined as an age-specific prevalence of infection of <90%  
80 by 10 years of age but  $\geq 50\%$  by 15 years of age (3, 6, 10). The current approach includes targeted  
81 vaccination for high-risk populations in countries with lower infection rates, while routine

82 vaccination is discouraged in endemic countries to avoid paradoxical rise in disease incidence  
83 among unvaccinated individuals (10) (3, 6, 10). As of May 2021, immunization against HAV for  
84 children had been introduced or was planned to be introduced in only 34 countries (4).  
85 Immunization against HAV has been successfully integrated into the national immunization  
86 programs of Bahrain, Oman, Qatar, Saudi Arabia, and Tunisia (11). In Iraq, targeted vaccination  
87 schemes for high-risk populations are also in place (11). Nevertheless, in most other countries in  
88 the region, HAV vaccines are only available at a cost in the private sector (11).

89 In the Middle East and North Africa (MENA) region, a systematic review of evidence indicated a  
90 decline in reported HAV incidence among children over the past two decades (11). However, HAV  
91 remains endemic at high incidence in few countries, including Egypt, Morocco, and Pakistan, as  
92 well as in geographic areas marked by conflict (11, 12).

93 Given the limited global data on viral hepatitis infections among migrant populations, this study  
94 aimed to determine HAV antibody prevalence (seroprevalence), indicating a history of HAV  
95 infection, among Qatar's craft and manual worker (CMW) population. Qatar, known for its diverse  
96 demographics with 89% of the population comprising expatriates from over 150 countries (13),  
97 has a large CMW population, constituting approximately 60% of the total population of the  
98 country. This population group, primarily consisting of unmarried men aged 20-49 years, is  
99 recruited for employment in infrastructure and development projects, including those associated  
100 with the World Cup 2022 (14-16). The majority of CMWs originate from countries where HAV  
101 infection is endemic at high incidence, and the typical age for acquiring the infection is below 10  
102 years (12, 17). The overarching objective of this study was to provide insights into HAV  
103 epidemiology and contribute data to national initiatives aiming to meet global targets for viral  
104 hepatitis elimination.

## 105    **METHODS**

### 106    **Study design, sampling, and specimen collection and handling.**

107    This study tested deidentified stored blood serum specimens collected during a nationwide  
108    serological survey conducted from July 26, 2020, to September 09, 2020 to determine the severe  
109    acute respiratory syndrome coronavirus 2 (SARS-CoV-2) seroprevalence among CMWs (14, 18,  
110    19). The survey's sampling strategy was formulated following an analysis of the registered users'  
111    database of the Qatar Red Crescent Society (QRCS), the primary healthcare provider for CMWs  
112    in the country (14).

113    QRCS manages four centers strategically spread across Qatar to address the healthcare needs of  
114    CMWs nationwide (14). These centers cover expansive catchment areas, operate extended hours,  
115    and provide services either free of charge or with substantial subsidies (14). To ensure sample  
116    representativeness, the probability distribution of CMWs by age and nationality from the QRCS  
117    database was cross-referenced with that of expatriate residents from the Ministry of Interior  
118    database (20).

119    With men constituting >99% of CMWs (21), the sampling strategy did not explicitly factor sex.  
120    CMWs were recruited at QRCS centers using a systematic sampling approach, informed by the  
121    average daily attendance at each center (14). At each center, recruitment proceeded by inviting  
122    every 4<sup>th</sup> attendee to participate in the study until the required sample size was reached for all age  
123    and nationality strata. To address challenges in recruiting participants in smaller age-nationality  
124    strata, especially among younger individuals of specific nationalities, the recruitment criteria were  
125    adjusted towards the conclusion of the study. In these instances, all attendees in these strata were  
126    invited to participate, rather than every 4<sup>th</sup> attendee.

127 Trained interviewers administered the written informed consent and the study instrument to  
128 participants, accommodating their language preferences among nine options: Arabic, Bengali,  
129 English, Hindi, Nepali, Sinhala, Tagalog, Tamil, and Urdu (14). The instrument, designed  
130 following WHO guidance for developing SARS-CoV-2 sero-epidemiological surveys (22),  
131 collected essential socio-demographic information. Certified nurse's drew a 10 mL blood  
132 specimen for serological testing, which was then stored in an icebox before transportation to the  
133 Qatar Biobank for long-term storage and subsequent testing.

### 134 **Laboratory methods**

135 Serum aliquots were extracted from the archived specimens at the Qatar Biobank (QBB) and  
136 subsequently transferred to the virology laboratory at Qatar University (QU) for serological  
137 testing. The sera at both the QBB and QU were maintained at -80°C until employed for serology  
138 testing.

139 HAV seroprevalence was determined by testing sera for HAV antibodies using Dia.Pro  
140 competitive enzyme linked Immunosorbent Assay (ELISA) From Diagnostic Bioprobes Srl,  
141 Milano, Italy (23). This assay has a reported sensitivity of 100% and a specificity exceeding 98%  
142 (23). Interpretation of test results followed the manufacturer's guidelines. Specimens with a mean  
143 cut-off/optical density (OD) value at 450nm (designated as cut-off index values) below 0.9 were  
144 considered negative, those surpassing 1.1 were considered positive, and those within the range of  
145 0.9 to 1.1 were considered equivocal (23). Equivocal samples were excluded from further analysis.  
146 The mean cut-off value was calculated using the equation: mean cut-off value = (OD value for the  
147 negative control well + OD value for the positive control well)/3 (23).

### 148 **Oversight**

149 This study received approval from the Institutional Review Boards of Hamad Medical  
150 Corporation, Qatar University, and Weill Cornell Medicine-Qatar. The reporting of the study  
151 adhered to the Strengthening the Reporting of Observational Studies in Epidemiology (STROBE)  
152 guidelines, as detailed in Table S1 in the Online Supplementary Document.

### 153 **Statistical analysis**

154 Frequency distributions and measures of central tendency were used to describe study participants.  
155 HAV seroprevalence was estimated after applying probability weights to correct for participants'  
156 unequal selection and ensure the sample's representativeness of the broader CMW population.  
157 Weights were calculated using the population distribution of CMWs by age, nationality, and QRCS  
158 center, extracted from the QRCS registered-user database (14). HAV cut-off index values obtained  
159 from testing with the Dia.Pro competitive ELISA were illustrated using a histogram.

160 Associations with HAV infection were explored through Chi-square tests and univariable and  
161 multivariable Poisson regression analyses with robust error variance, not logistic regression  
162 analyses, given the high observed HAV seroprevalence levels (24, 25). Variables with a p-value  
163  $\leq 0.2$  in the univariable analyses were included in the multivariable model. A p-value  $< 0.05$  in the  
164 multivariable analysis was considered indicative of a statistically significant association.  
165 Unadjusted and adjusted relative risks (RRs and ARRs, respectively), along with their respective  
166 95% confidence intervals (CIs) and p-values, were reported. Interactions were not considered. All  
167 statistical analyses were conducted using Stata/SE version 18.0 (Stata Corporation, College  
168 Station, TX, USA).

## 169 **RESULTS**

### 170 **Study population.**



171 Table 1 outlines the characteristics of the study participants. Among the 2,641 blood specimens  
 172 collected during the SARS-CoV-2 seroprevalence survey (14), only 2,616 specimens were  
 173 available and had sufficient sera for HAV testing. Of these, 2,393 specimens were positive, 214  
 174 were negative, and 9 were equivocal and therefore excluded from further analysis.

175 **Table 1.** Characteristics and seroprevalence of HAV infection among study participants.

| Characteristics                                 | Tested               |              | HAV seroprevalence                   |                    |           |
|-------------------------------------------------|----------------------|--------------|--------------------------------------|--------------------|-----------|
|                                                 | N (%)                | N            | % <sup>†</sup> (95% CI) <sup>†</sup> | Chi-square p-value |           |
| Age (years)                                     |                      |              |                                      |                    |           |
| ≤29                                             | 747 (27.7)           | 637          | 86.4 (83.7-88.7)                     | <0.001             |           |
| 30-39                                           | 966 (41.8)           | 893          | 92.5 (90.6-94.0)                     |                    |           |
| 40-49                                           | 545 (21.4)           | 521          | 96.2 (94.2-97.5)                     |                    |           |
| 50-59                                           | 258 (7.4)            | 251          | 96.8 (93.3-98.5)                     |                    |           |
| 60+                                             | 91 (1.7)             | 91           | 100.0 (96.0-100.0) <sup>‡</sup>      |                    |           |
| Nationality                                     |                      |              |                                      |                    |           |
| All other nationalities <sup>§</sup>            | 231 (7.6)            | 210          | 90.6 (85.9-93.8)                     | <0.001             |           |
| Bangladeshi                                     | 623 (26.0)           | 610          | 97.9 (96.4-98.8)                     |                    |           |
| Egyptian                                        | 90 (3.2)             | 86           | 95.7 (88.2-98.5)                     |                    |           |
| Filipino                                        | 102 (2.7)            | 78           | 78.3 (68.1-86.0)                     |                    |           |
| Indian                                          | 716 (29.2)           | 628          | 87.6 (84.9-89.9)                     |                    |           |
| Nepalese                                        | 564 (21.7)           | 539          | 95.6 (93.5-97.1)                     |                    |           |
| Pakistani                                       | 136 (4.9)            | 135          | 99.8 (98.2-99.9)                     |                    |           |
| Sri Lankan                                      | 145 (4.8)            | 107          | 70.9 (62.4-78.2)                     |                    |           |
| QRCS center (catchment area within Qatar)       |                      |              |                                      |                    |           |
| Fereej Abdel Aziz (Doha-East)                   | 611 (23.5)           | 548          | 89.8 (87.1-92.0)                     | 0.132              |           |
| Zekreet (North-West)                            | 234 (2.3)            | 215          | 92.0 (87.7-94.9)                     |                    |           |
| Hemaila (South-West; “Industrial Area”)         | 964 (41.9)           | 897          | 93.5 (91.8-94.9)                     |                    |           |
| Mesaimmer (Doha-South)                          | 798 (32.4)           | 733          | 91.8 (89.6-93.5)                     |                    |           |
| Educational attainment                          |                      |              |                                      |                    |           |
| Primary or lower                                | 626 (24.6)           | 592          | 94.4 (92.2-96.1)                     | <0.001             |           |
| Intermediate                                    | 429 (17.9)           | 417          | 97.4 (95.3-98.5)                     |                    |           |
| Secondary/High school/Vocational                | 1,085 (44.1)         | 1,003        | 92.7 (91.0-94.2)                     |                    |           |
| University                                      | 369 (13.4)           | 285          | 76.5 (71.6-80.8)                     |                    |           |
| Occupation                                      |                      |              |                                      |                    |           |
| Professional workers <sup>¶</sup>               | 136 (4.9)            | 107          | 76.9 (68.4-83.6)                     | <0.001             |           |
| Food & beverage workers                         | 91 (3.2)             | 79           | 89.0 (80.7-94.0)                     |                    |           |
| Administration workers                          | 82 (3.0)             | 73           | 87.5 (77.2-93.5)                     |                    |           |
| Retail workers                                  | 169 (6.6)            | 149          | 90.1 (84.6-93.8)                     |                    |           |
| Transport workers                               | 430 (16.4)           | 402          | 93.5 (90.6-95.6)                     |                    |           |
| Security workers                                | 60 (2.3)             | 55           | 91.1 (80.2-96.3)                     |                    |           |
| Cleaning workers                                | 105 (4.0)            | 96           | 91.7 (84.7-95.6)                     |                    |           |
| Technical and construction workers <sup>‡</sup> | 1,311 (52.8)         | 1,237        | 94.6 (93.1-95.7)                     |                    |           |
| Other workers <sup>**</sup>                     | 174 (6.8)            | 151          | 86.5 (80.4-90.9)                     |                    |           |
| <b>Total (% , 95% CI)</b>                       | <b>2,607 (100.0)</b> | <b>2,393</b> | <b>92.0 (90.9-93.1)</b>              |                    | <b>--</b> |

176 CI, confidence interval; QRCS, Qatar Red Crescent Society.

177 <sup>†</sup>Percentage of the sample weighted by age, nationality, and QRCS center. Missing values for socio-demographic variables were excluded from  
 178 the analysis.

179 <sup>‡</sup>Percentage of positive out of the total sample weighted by age, nationality, and QRCS center.

180 <sup>‡</sup>The 95% confidence intervals were calculated using the binomial distribution.

181 <sup>§</sup>Includes all other nationalities of craft and manual workers residing in Qatar.

182 <sup>¶</sup>Includes architects, designers, engineers, operation managers, and supervisors among other professions.

183 <sup>‡</sup>Includes carpenters, construction workers, crane operators, electricians, foremen, maintenance/air conditioning/cable technicians, masons,  
 184 mechanics, painters, pipe-fitters, plumbers, and welders among other professions.

185 <sup>\*\*</sup>Includes barbers, firefighters, gardeners, farmers, fishermen, and physical fitness trainers among other professions.

186

187 Around 70% of the study participants were younger than 40 years, with a median age of 35.0 years  
188 and an interquartile range (IQR) spanning 29.0-43.0 years. Slightly more than 40% of participants  
189 had educational attainment at intermediate or lower levels, 44.1% had high school education or  
190 vocational training, and 13.4% had higher educational attainment. The distribution of nationalities  
191 highlighted a prevalent presence of Indians (29.2%), Bangladeshis (26.0%), and Nepalese (21.7%),  
192 aligning with the broader demographic composition of the CMW population in Qatar (20). Over  
193 half of CMWs (52.8%) were employed in technical and construction jobs, which included  
194 occupations such as carpenters, crane operators, electricians, masons, mechanics, painters,  
195 plumbers, and welders.

#### 196 **HAV seroprevalence and associations with infection**

197 HAV seroprevalence among CMWs was estimated at 92.0% (95% CI: 90.9-93.1%). HAV cut-off  
198 index values in positive specimens ranged from 1.1 to 485.0 (Figure 1), with a median of 22.8  
199 (IQR: 15.9-27.3).

200 **Fig 1.** Distribution of the mean cut-off/optical density (OD) values at 450nm among HAV  
201 antibody-positive individuals as measured using the Dia.Pro Competitive ELISA.  
202

203 Table 1 shows HAV seroprevalence estimates across various socio-demographic characteristics  
204 within the population. Figure 2 illustrates HAV seroprevalence by nationality group. Despite  
205 variations, HAV seroprevalence was generally high ranging from 70.9% (95% CI: 62.4-78.2%)  
206 among Sri Lankans to 99.8% (95% CI: 98.2-99.9%) among Pakistanis.

207 **Fig 2.** HAV seroprevalence by nationality group among the craft and manual worker population  
208 in Qatar.  
209

210 The multivariable regression analysis identified age, nationality, and educational attainment as  
 211 statistically significant factors associated with HAV infection (Table 2). The ARR increased  
 212 gradually with age. Relative to CMWs  $\leq 29$  years of age, the ARR was 1.06 (95% CI: 1.03-1.10)  
 213 in CMWs aged 30-39 years and reached 1.15 (95% CI: 1.10-1.19) in those aged  $\geq 50$  years. There  
 214 were significant differences by nationality, where compared to Indians, the ARR was lower among  
 215 Sri Lankans assessed at 0.81 (95% CI: 0.72-0.91), but higher among Nepalese at 1.07 (95% CI:  
 216 1.04-1.11), Bangladeshis at 1.10 (95% CI: 1.07-1.13), Pakistanis at 1.12 (95% CI: 1.09-1.15), and  
 217 Egyptians at 1.15 (95% CI: 1.08-1.23).

218 **Table 2.** Associations with HAV infection among the craft and manual worker population in  
 219 Qatar.

| Characteristics                           | Univariable regression analysis |         |                 | Multivariable regression analysis |          |
|-------------------------------------------|---------------------------------|---------|-----------------|-----------------------------------|----------|
|                                           | RR* (95% CI*)                   | p-value | F test p-value† | ARR* (95% CI*)                    | p-value‡ |
| Age (years)                               |                                 |         |                 |                                   |          |
| ≤29                                       | 1.00                            |         |                 | 1.00                              |          |
| 30-39                                     | 1.07 (1.03-1.11)                | <0.001  | <0.001          | 1.06 (1.03-1.10)                  | <0.001   |
| 40-49                                     | 1.11 (1.08-1.15)                | <0.001  |                 | 1.12 (1.08-1.15)                  | <0.001   |
| 50+                                       | 1.13 (1.09-1.17)                | <0.001  |                 | 1.15 (1.10-1.19)                  | <0.001   |
| Nationality                               |                                 |         |                 |                                   |          |
| Indian§                                   | 1.00                            |         | <0.001          | 1.00                              |          |
| Bangladeshi                               | 1.12 (1.08-1.15)                | <0.001  |                 | 1.10 (1.07-1.13)                  | <0.001   |
| Egyptian                                  | 1.09 (1.03-1.15)                | 0.002   |                 | 1.15 (1.08-1.23)                  | <0.001   |
| Nepalese                                  | 1.09 (1.06-1.13)                | <0.001  |                 | 1.07 (1.04-1.11)                  | <0.001   |
| Pakistani                                 | 1.14 (1.11-1.17)                | <0.001  |                 | 1.12 (1.09-1.15)                  | <0.001   |
| Sri Lankan                                | 0.81 (0.72-0.91)                | <0.001  |                 | 0.81 (0.72-0.91)                  | <0.001   |
| All other nationalities¶                  | 1.00 (0.95-1.05)                | 0.920   |                 | 1.05 (0.99-1.11)                  | 0.122    |
| QRCS center (catchment area within Qatar) |                                 |         |                 |                                   |          |
| Fereej Abdel Aziz (Doha-East)             | 1.00                            |         | 0.084           | 1.00                              |          |
| Zekreet (North-West)                      | 1.03 (0.98-1.07)                | 0.302   |                 | 1.01 (0.96-1.06)                  | 0.691    |
| Hemaila (South-West; “Industrial Area”)   | 1.04 (1.01-1.08)                | 0.012   |                 | 1.01 (0.98-1.05)                  | 0.416    |
| Mesaimmeer (Doha-South)                   | 1.02 (0.99-1.06)                | 0.208   |                 | 1.01 (0.97-1.04)                  | 0.690    |
| Educational attainment                    |                                 |         |                 |                                   |          |
| Primary or lower                          | 1.00                            |         | <0.001          | 1.00                              |          |
| Intermediate                              | 1.03 (1.01-1.06)                | 0.019   |                 | 1.04 (1.02-1.07)                  | 0.002    |
| Secondary/High school/Vocational          | 0.98 (0.96-1.01)                | 0.179   |                 | 1.01 (0.98-1.04)                  | 0.389    |
| University                                | 0.81 (0.76-0.86)                | <0.001  |                 | 0.85 (0.79-0.91)                  | <0.001   |
| Occupation                                |                                 |         |                 |                                   |          |
| Professional workers**                    | 1.00                            |         | <0.001          | 1.00                              |          |
| Food and beverage workers                 | 1.16 (1.02-1.31)                | 0.019   |                 | 1.05 (0.92-1.18)                  | 0.487    |
| Administration workers                    | 1.14 (0.99-1.30)                | 0.059   |                 | 1.08 (0.95-1.23)                  | 0.231    |
| Retail workers                            | 1.17 (1.05-1.31)                | 0.005   |                 | 1.07 (0.96-1.20)                  | 0.225    |
| Transport workers                         | 1.22 (1.10-1.35)                | <0.001  |                 | 1.07 (0.96-1.19)                  | 0.200    |
| Security workers                          | 1.18 (1.04-1.35)                | 0.010   |                 | 1.06 (0.93-1.22)                  | 0.388    |
| Cleaning workers                          | 1.19 (1.06-1.34)                | 0.003   |                 | 1.08 (0.96-1.21)                  | 0.191    |
| Technical and construction workers††      | 1.23 (1.11-1.36)                | <0.001  |                 | 1.08 (0.98-1.20)                  | 0.134    |
| Other workers‡‡                           | 1.12 (1.00-1.26)                | 0.047   |                 | 1.03 (0.92-1.16)                  | 0.634    |

220 ARR, adjusted relative risk; CI, confidence interval; RR, relative risk; QRCS, Qatar Red Crescent Society.

221 †Estimates weighted by age, nationality, and QRCS center.

222 ‡Covariates with p-value  $\leq 0.2$  in the univariable analysis were included in the multivariable analysis.

223 §Covariates with p-value  $< 0.05$  in the multivariable analysis were considered to provide statistically significant evidence for an association.

224 §Indian was chosen as the reference group due to its comparatively low prevalence of HAV seroprevalence and a sufficiently large sample size, making it a suitable reference group for the regression analysis.

225 ¶Includes all other nationalities of craft and manual workers residing in Qatar.

227 \*\*Professional workers include architects, designers, engineers, operation managers, and supervisors among other professions.  
228 ††Technical and construction workers include carpenters, construction workers, crane operators, electricians, foremen, maintenance/air  
229 conditioning/cable technicians, masons, mechanics, painters, pipe-fitters, plumbers, and welders among other professions.  
230 ††Other workers include barbers, firefighters, gardeners, farmers, fishermen, and physical fitness trainers among other professions.  
231

232 Significant differences were observed based on educational attainment. CMWs with intermediate  
233 education had an ARR of 1.04 (95% CI: 1.02-1.07) while those with university education had an  
234 ARR of 0.85 (95% CI: 0.79-0.91), both compared to those with primary or lower education. No  
235 evidence for differences was found by QRCS center (proxy of catchment area/geographic location)  
236 or by occupation.

## 237 **DISCUSSION**

238 HAV seroprevalence is highly elevated among the CMW population in Qatar, with over nine out  
239 of every ten individuals having experienced this infection. This observation suggests that nearly  
240 the entire CMW population has acquired the infection, predominantly during childhood before  
241 relocating to Qatar, considering the very high HAV seroprevalence observed in the migrants'  
242 countries of origin (12, 17). This underscores the significance of a comprehensive plan for HAV  
243 prevention. Such a plan should incorporate measures to promote safe water and sanitation  
244 practices, along with adherence to WHO recommendations for HAV vaccination in countries  
245 where individuals face a heightened risk of symptomatic infection (3, 6, 10).

246 While HAV seroprevalence was generally very high, some variations were observed. These  
247 variations included differences by nationality, with Sri Lankans exhibiting the lowest  
248 seroprevalence and Nepalese, Bangladeshis, Pakistanis, and Egyptians having the highest  
249 seroprevalence. Seroprevalence was at its lowest among individuals with a university education,  
250 suggesting an association between infection and lower socio-economic status, as observed  
251 elsewhere (17). Seroprevalence increased with age, consistent with expectations for a measure of

252 cumulative exposure to the infection. However, the rate of increase with age was slow, indicating  
253 that only a minority of infections are acquired in adulthood.

254 Our study represents the first endeavor to estimate the seroprevalence of HAV in Qatar, filling a  
255 critical gap in the existing research. Its significance is underscored by the scarcity of studies on  
256 HAV seroprevalence in the Middle East, particularly among QRCS and the Gulf region, where  
257 CMWs constitute a significant demographic. Prominent strengths of our study include a substantial  
258 sample size and the utilization of a highly sensitive ELISA for detecting HAV antibodies,  
259 enhancing the reliability and accuracy of the seroprevalence results.

260 This study is subject to certain limitations. Originally designed to employ a probability-based  
261 sampling strategy for CMW recruitment, logistical challenges led to the implementation of a  
262 systematic sampling method, concentrating on QRCS attendees. In response to this modification,  
263 probability-based weights were introduced to produce a seroprevalence estimate that aligns with  
264 the broader CMW population. To account for the representation of smaller age-nationality strata,  
265 a deviation from the initial plan—selecting every fourth attendee—was introduced. Towards the  
266 end of the study, all individuals in these strata were approached to participate, ensuring a more  
267 comprehensive representation of the sampled population.

268 Operational challenges presented difficulties in monitoring and maintaining consistent records of  
269 the response rate among nurses in the QRCS centers. As a result, an exact estimate of the response  
270 rate could not be determined, but it was approximated to exceed 90% based on the interviewers'  
271 experience. While there is potential for the recruitment scheme to impact the generalizability of  
272 the study findings, this is considered less likely given the substantial daily influx of CMWs visiting  
273 these centers, surpassing 5,000 patients daily (14). Of note that these centers serve as the primary  
274 healthcare providers for CMWs in the country, offering a range of services beyond patient

275 treatment, including periodic health certifications, vaccinations, and pre-travel SARS-CoV-2  
276 testing.

## 277 CONCLUSIONS

278 This study revealed a very high HAV seroprevalence among Qatar's CMW population, with more  
279 than 90% having experienced the infection. This underscores that virtually the entire CMW  
280 population contracted the infection, presumably during childhood before their migration to Qatar,  
281 given the comparably elevated HAV seroprevalence in their countries of origin. Despite the overall  
282 elevated seroprevalence, notable variations were observed, particularly across nationalities and  
283 socio-economic strata. These findings contribute considerations for healthcare service planning  
284 and policy development. This aims to alleviate the burden of HAV-related illnesses and work  
285 towards the 2030 targets for viral hepatitis elimination.

## 286 **Acknowledgements**

287 We thank all participants for their willingness to be part of this study. We thank all members of  
288 the Craft and Manual Workers Seroprevalence Study Group for their efforts in supporting the  
289 collection of the samples of this study. We also thank Dr. Nahla Afifi, Director of Qatar Biobank  
290 (QBB), Ms. Tasneem Al-Hamad, Ms. Eiman Al-Khayat, and the rest of the QBB team for their  
291 unwavering support in retrieving and analyzing samples. We also acknowledge the dedicated  
292 efforts of the Surveillance Team at the Ministry of Public Health for their support in sample  
293 collection.

## 294 **Funding**

295 The authors are also grateful for support from the Biomedical Research Program and the  
296 Biostatistics, Epidemiology, and Biomathematics Research Core, both at Weill Cornell Medicine-  
297 Qatar, as well as for support provided by the Ministry of Public Health and Hamad Medical  
298 Corporation. This work was supported by the National Priorities Research Program (NPRP) grant  
299 numbers: 12S-0216-190094, 13S-0128-200185, GSRA8-L-1-0501-21022, and UREP30-041-3-  
300 014 from the Qatar National Research Fund (a member of Qatar Foundation). The funders of the  
301 study had no role in study design, data collection, data analysis, data interpretation, or writing of  
302 the article. Statements made herein are solely the responsibility of the authors.

## 303 **Authorship contributions**

304 GKN conceived the study and led the laboratory testing. NY, PBN, TAH, MA, and HMY  
305 conducted the lab testing of the specimens. GKN and NY validated and interpreted the laboratory  
306 results. HC developed the study design, managed the databases, performed the data analyses, and  
307 wrote the first draft of the article. LJA led the statistical analyses and contributed to the first draft

308 of the article. GKN and LJA critically reviewed the manuscript. All authors have read and  
309 approved the final manuscript.

### 310 **Disclosure of interest**

311 I have read the journal's policy and the authors of this manuscript have the following competing  
312 interests: Dr. Gheyath K. Nasrallah is currently an academic editor at PLOS ONE.

### 313 **Data availability statement**

314 All data are available in aggregate form within the manuscript.

### 315 **Ethics approval**

316 Hamad Medical Corporation, Qatar University (QU-IRB 1558-EA/21), and Weill Cornell  
317 Medicine-Qatar Institutional Review Boards approved this study.

### 318 **ORCID iDs**

319 Nadin Younes <https://orcid.org/0000-0002-5241-944X>  
320 Hiam Chemaitelly <https://orcid.org/0000-0002-8756-6968>  
321 Laith Abu-Raddad <https://orcid.org/0000-0003-0790-0506>  
322 Gheyath Nasrallah <https://orcid.org/0000-0001-9252-1038>



## REFERENCES

1. Zeng DY, Li JM, Lin S, Dong X, You J, Xing QQ, et al. Global burden of acute viral hepatitis and its association with socioeconomic development status, 1990-2019. *J Hepatol.* 2021;75(3):547-56.
2. World Health Organization. Hepatitis A. Available from: <https://www.who.int/news-room/fact-sheets/detail/hepatitis-a>. Accessed on January 5, 2024. 2023.
3. World Health Organization. WHO Immunological Basis for Immunization Series, Module 18: Hepatitis A Update; WHO: Geneva, Switzerland. Available from: <https://www.who.int/publications/i/item/97892516327>. Accessed on January 5, 2024. 2019.
4. Cao G, Jing W, Liu J, Liu M. The global trends and regional differences in incidence and mortality of hepatitis A from 1990 to 2019 and implications for its prevention. *Hepatol Int.* 2021;15(5):1068-82.
5. Wenzel JJ, Allerberger F. Hepatitis A as a foodborne infection. *The Lancet Infectious Diseases.* 2014;14(10):907-8.
6. Miguères M, Lhomme S, Izopet J. Hepatitis A: epidemiology, high-risk groups, prevention and research on antiviral treatment. *Viruses.* 2021;13(10):1900.
7. Jacobsen KH. Globalization and the Changing Epidemiology of Hepatitis A Virus. *Cold Spring Harb Perspect Med.* 2018;8(10).
8. Anita C, Tanisha B. Epidemiology of Hepatitis A: Past and Current Trends. In: Costin Teodor S, Cristin Constantin V, Ion R, Valeria T, Silvia L, editors. *Hepatitis A and Other Associated Hepatobiliary Diseases.* Rijeka: IntechOpen; 2019. p. Ch. 1.
9. World Health Organization. Global health sector strategies on, respectively, HIV, viral hepatitis and sexually transmitted infections for the period 2022-2030. Found at: <file:///C:/Users/gm15/Downloads/9789240053779-eng.pdf>. Accessed June 7, 2023. 2022.
10. World Health Organization. Summary of WHO Position Paper on hepatitis A vaccines, October 2022. Available from: [efaidnbmnbbpcajpcglclefindmkaj/https://iris.who.int/bitstream/handle/10665/363396/WER9740-eng-fre.pdf?sequence=1](https://iris.who.int/bitstream/handle/10665/363396/WER9740-eng-fre.pdf?sequence=1). Accessed on: January 10, 2024. 2022.
11. Badur S, Ozturk S, AbdelGhany M, Khalaf M, Lagoubi Y, Ozudogru O, et al. Hepatitis A in the Eastern Mediterranean Region: a comprehensive review. *Hum Vaccin Immunother.* 2022;18(5):2073-146.
12. Nelson N., Weng M. Hepatitis A. *CDC Yellow Book 2024.* Available from: <https://wwwnc.cdc.gov/travel/yellowbook/2024/infections-diseases/hepatitis-a#map506>. Accessed on: January 8, 2024. 2024.
13. Abu-Raddad LJ, Chemaitelly H, Ayoub HH, Al Kanaani Z, Al Khal A, Al Kuwari E, et al. Characterizing the Qatar advanced-phase SARS-CoV-2 epidemic. *Sci Rep.* 2021;11(1):6233.
14. Al-Thani MH, Farag E, Bertollini R, Al Romaihi HE, Abdeen S, Abdelkarim A, et al. SARS-CoV-2 Infection Is at Herd Immunity in the Majority Segment of the Population of Qatar. *Open Forum Infect Dis.* 2021;8(8):ofab221.
15. AlNuaimi AA, Chemaitelly H, Semaan S, AlMukdad S, Al-Kanaani Z, Kaleeckal AH, et al. All-cause and COVID-19 mortality in Qatar during the COVID-19 pandemic. *BMJ Glob Health.* 2023;8(5).
16. Jeremijenko A, Chemaitelly H, Ayoub HH, Alishaq M, Abou-Samra AB, Al Ajmi J, et al. Herd Immunity against Severe Acute Respiratory Syndrome Coronavirus 2 Infection in 10 Communities, Qatar. *Emerg Infect Dis.* 2021;27(5):1343-52.
17. Mohd Hanafiah K, Jacobsen KH, Wiersma ST. Challenges to mapping the health risk of hepatitis A virus infection. *Int J Health Geogr.* 2011;10:57.
18. Nasrallah GK, Dargham SR, Al-Sadeq DW, Amanullah FH, Shurrab FM, Nizamuddin PB, et al. Seroprevalence of herpes simplex virus type 1 and type 2 among the migrant workers in Qatar. *Virol J.* 2023;20(1):188.

19. Younes N, Yassine HM, Nizamuddin PB, Kourentzi K, Tang P, Ayoub HH, et al. Seroprevalence of hepatitis E virus (HEV) among male craft and manual workers in Qatar (2020–2021). *Heliyon*. 2023;9(11):e21404.
20. Ministry of Interior-State of Qatar. Population distribution by sex, age, and nationality: results of Kashef database. 2020.
21. Planning and Statistics Authority-State of Qatar. Labor force sample survey. Available from: [https://www.psa.gov.qa/en/statistics/Statistical%20Releases/Social/LaborForce/2017/statistical\\_analyses\\_labor\\_force\\_2017\\_En.pdf](https://www.psa.gov.qa/en/statistics/Statistical%20Releases/Social/LaborForce/2017/statistical_analyses_labor_force_2017_En.pdf). Accessed on May 23, 2022.; 2017.
22. World Health Organization. Population-based age-stratified seroepidemiological investigation protocol for COVID-19 virus infection. Available from: <https://apps.who.int/iris/handle/10665/331656>. Accessed on: April 15, 2020. 2020.
23. Diagnostic Bioprobes Srl. Dia.Pro HAV Ab Competitive Enzyme ImmunoAssay (ELISA). Available from: <http://npt.ir/uploads/AVAB.CE.pdf>. Accessed on: January 5, 2024. 2015.
24. Barros AJ, Hirakata VN. Alternatives for logistic regression in cross-sectional studies: an empirical comparison of models that directly estimate the prevalence ratio. *BMC Med Res Methodol*. 2003;3:21.
25. Zou G. A modified poisson regression approach to prospective studies with binary data. *Am J Epidemiol*. 2004;159(7):702-6.



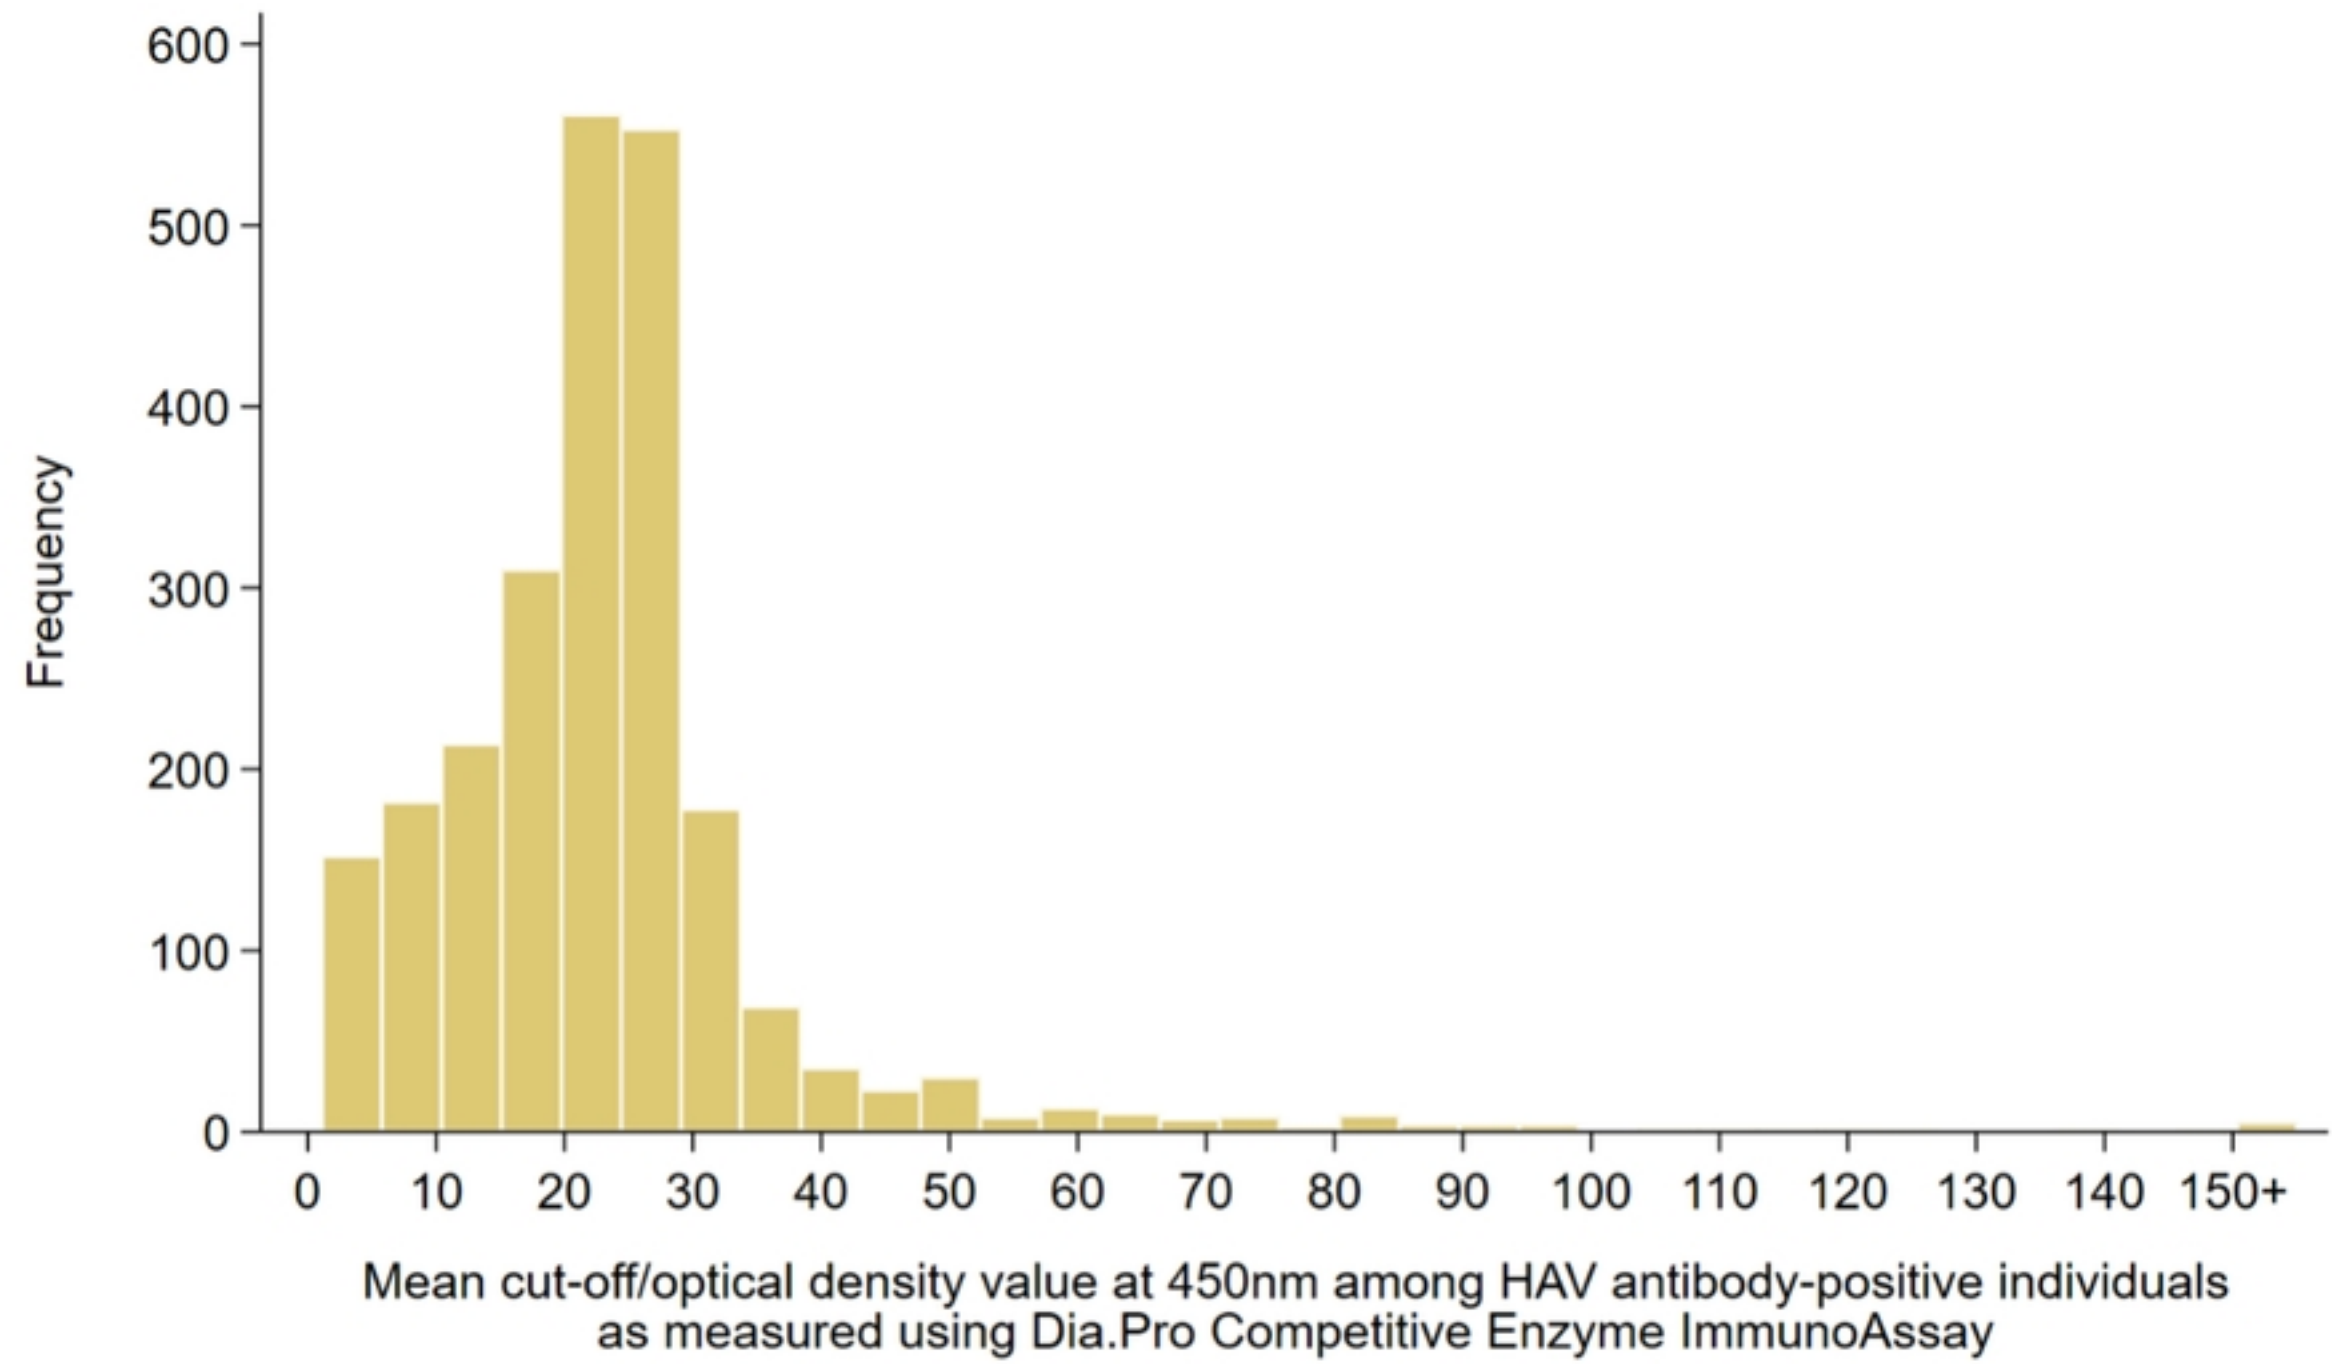

Fig 1

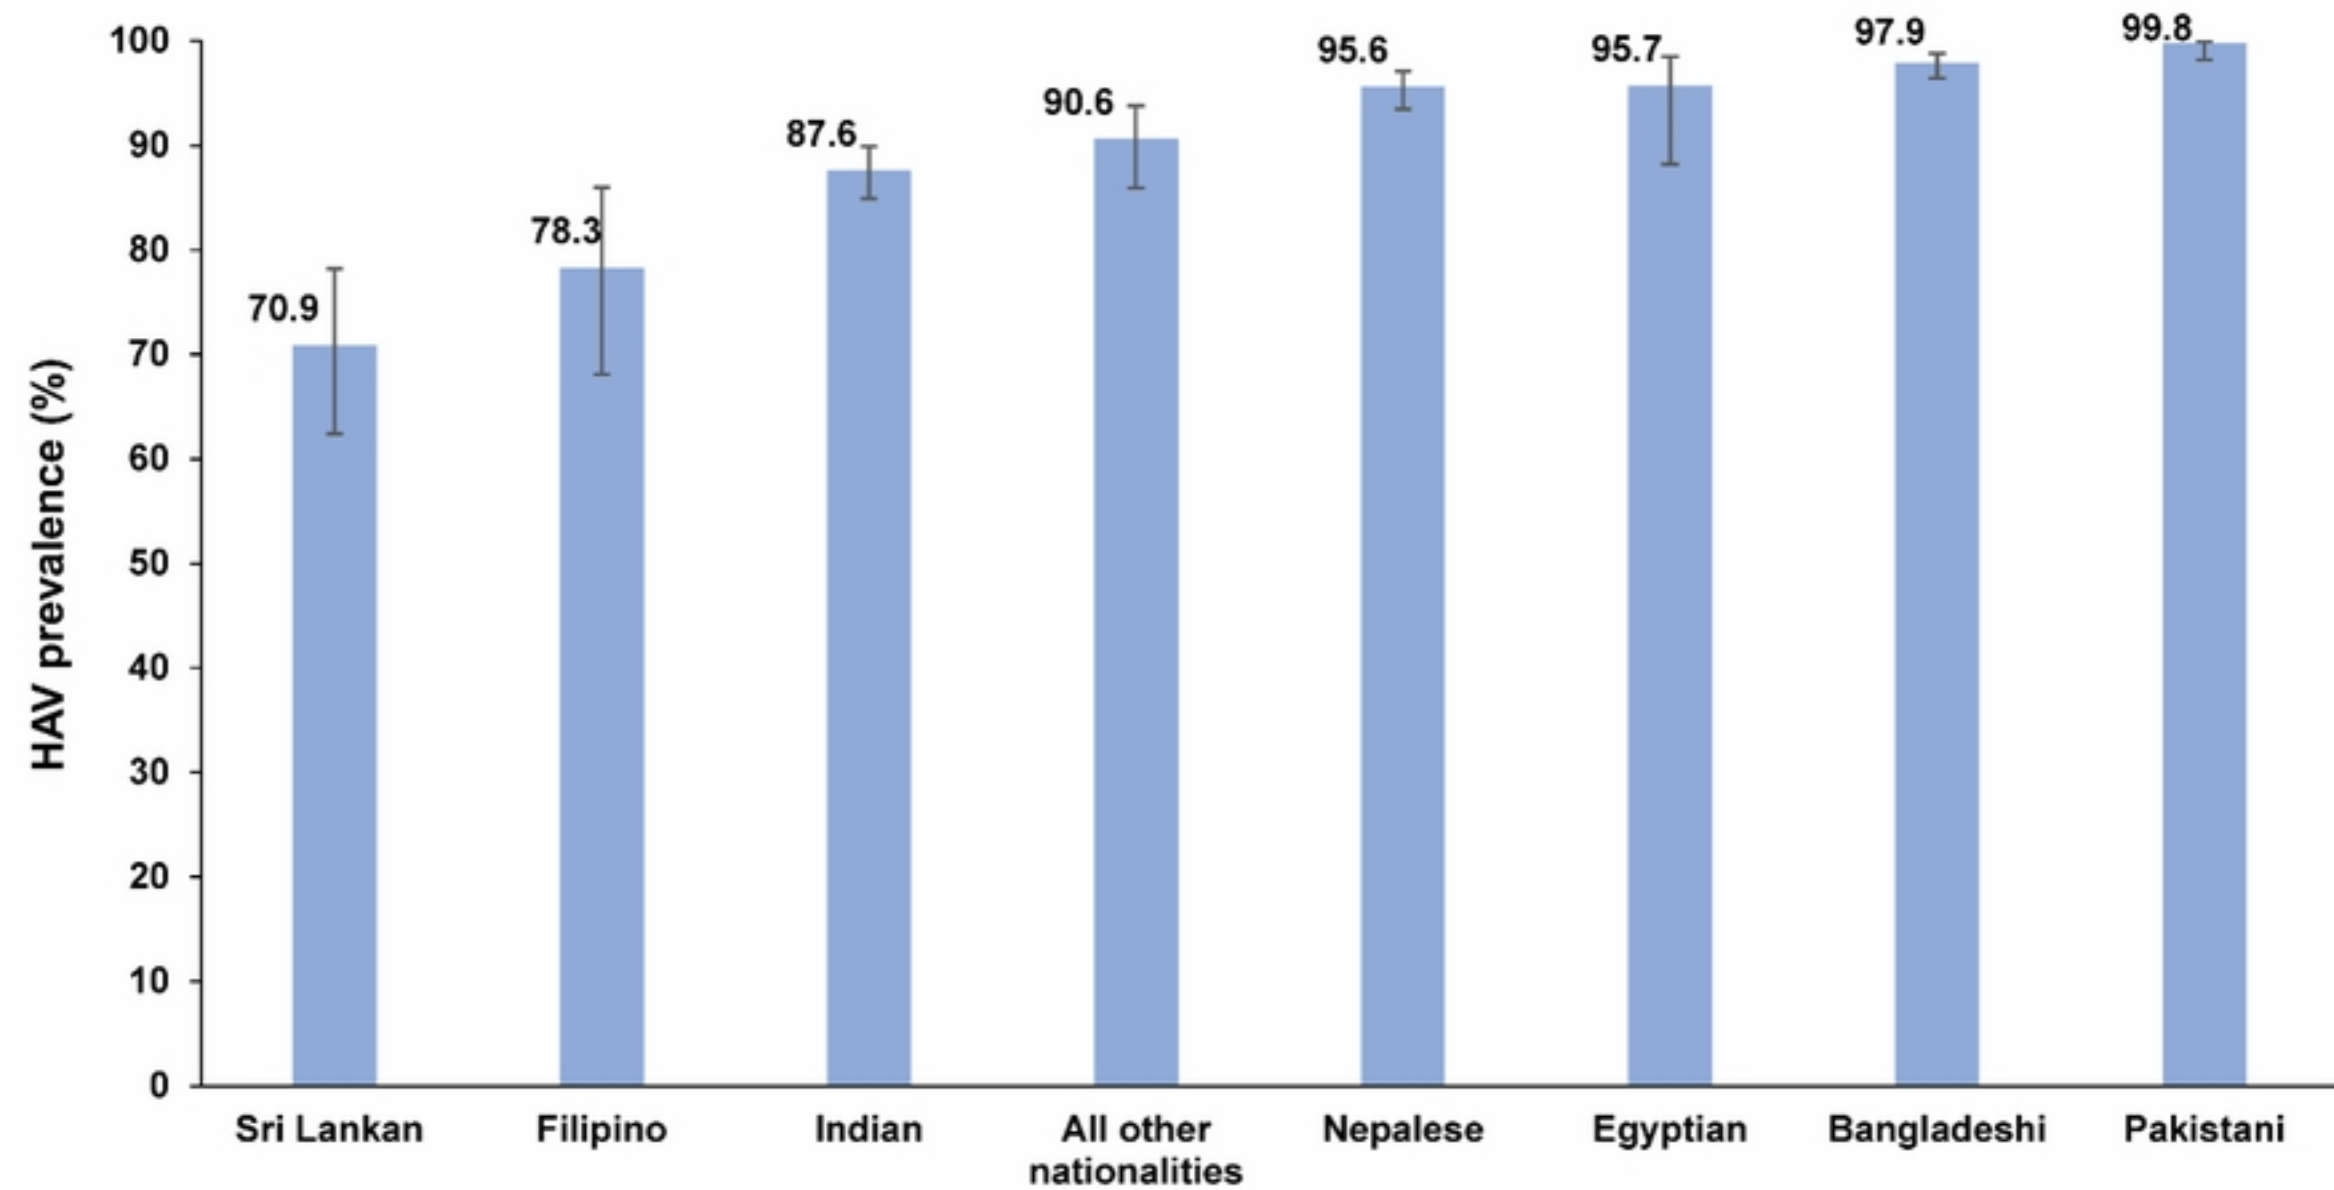

Fig 2
